# Supplementary material
Source: PubMed Central journal article supplement (PMC6911363)
Supplement: NIHMS1061513-supplement-SI_data.pdf [file NIHMS1061513-supplement-SI_data.pdf]

## Supporting Information

### **Icephobic Surfaces Induced by Interfacial Non-Frozen Water**

Dayong Chen<sup>1,2</sup>, Martin D. Gelenter<sup>3</sup>, Mei Hong<sup>3</sup>, Robert E. Cohen<sup>1\*</sup>,  
Gareth H. McKinley<sup>2\*</sup>

<sup>1</sup>Department of Chemical Engineering

<sup>2</sup>Department of Mechanical Engineering

<sup>3</sup>Department of Chemistry

Massachusetts Institute of Technology

Corresponding authors:

Robert E. Cohen, Fax: 01 617 258 8224. Email: [recohen@mit.edu](mailto:recohen@mit.edu)

Gareth H. McKinley, Fax: 01 617 258 8559. Email: [gareth@mit.edu](mailto:gareth@mit.edu)

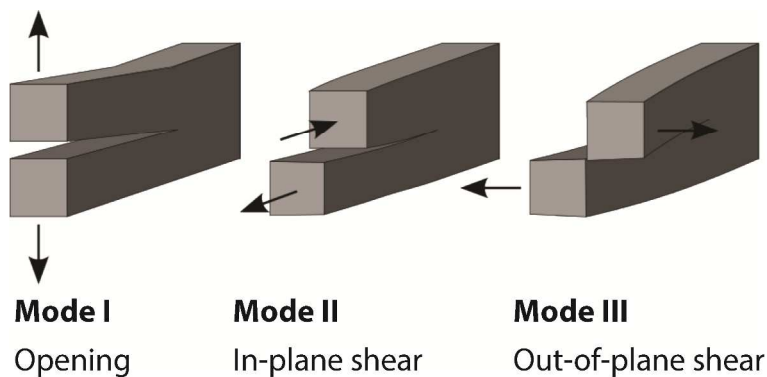

**Figure S1** Three modes of fracture. Using our current ice adhesion test apparatus as illustrated in Figure 1, the ice cubes detach from the surface mostly by Mode II (in-plane shear) fracture.

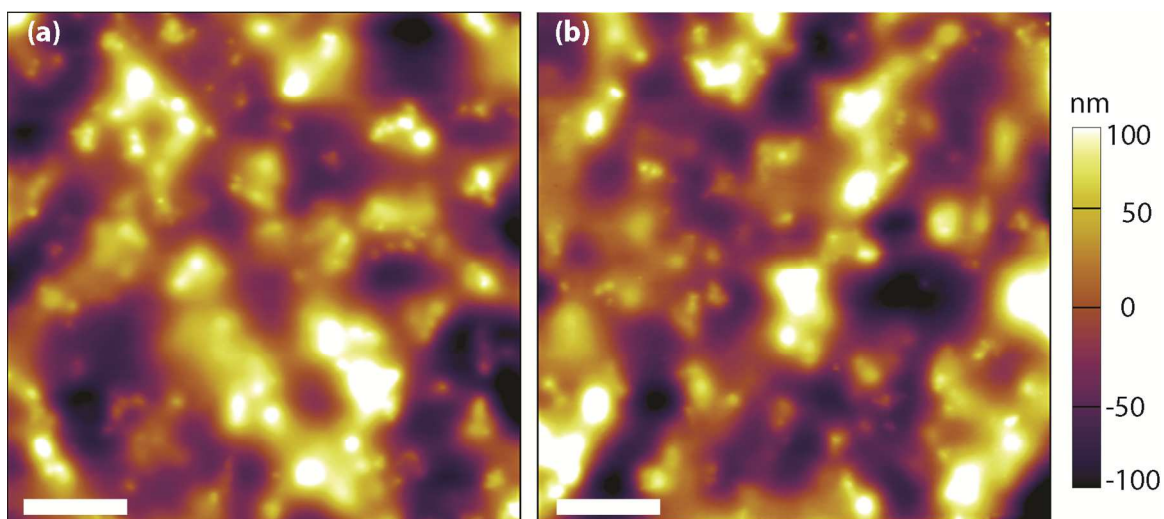

**Figure S2** Surface topography of a PDMS (Sylgard 184 10:1 base:crosslinker by weight) elastomer film containing 1 wt% PDMS-PEG copolymer (DBE-224) by atomic force microscopy (AFM). **(a)** The surface root-mean-square roughness is  $\sim 40$  nm in the dry state. **(b)** The wet state surface root-mean-square roughness remains about 40 nm measured by tapping mode AFM in water. Scale bars represent 10  $\mu\text{m}$ .

**Table S1.** Chemical Shift and Relaxation Data for Peaks A, B, and C.

| T (K) | Peak A                  |                                    |           | Peak B                  |                                    |           | Peak C                  |                                    |           |
|-------|-------------------------|------------------------------------|-----------|-------------------------|------------------------------------|-----------|-------------------------|------------------------------------|-----------|
|       | <sup>1</sup> H CS (ppm) | <sup>1</sup> H T <sub>2</sub> (ms) | β         | <sup>1</sup> H CS (ppm) | <sup>1</sup> H T <sub>2</sub> (ms) | β         | <sup>1</sup> H CS (ppm) | <sup>1</sup> H T <sub>2</sub> (ms) | β         |
| 276 K | 5.03                    | 566±13                             | 1.15±0.04 | 5.03                    | 354±8                              | 1.06±0.03 | N/A                     | N/A                                | N/A       |
| 268 K | 5.04                    | 389±61                             | 0.85±0.12 | 5.10                    | 216±15                             | 0.68±0.04 | 5.01                    | 150±15                             | 0.55±0.04 |
| 263 K | 5.08                    | 337±40                             | 0.99±0.13 | 5.15                    | 207±11                             | 0.70±0.03 | 5.12                    | 73±4                               | 0.66±0.03 |
| 258 K | 5.14                    | 225±20                             | 0.87±0.08 | 5.22                    | 65±12                              | 0.65±0.09 | 5.07                    | 13±2                               | 0.53±0.07 |
| 253 K | 5.25                    | 122±5                              | 1.02±0.05 | 5.27                    | 50±5                               | 0.79±0.07 | N/A                     | N/A                                | N/A       |

**Table S2.** Calculated Rotational Correlation Times and Viscosities for Peaks A, B, and C.

| T (K) | Peak A                               |          | Peak B                               |          | Peak C                               |          |
|-------|--------------------------------------|----------|--------------------------------------|----------|--------------------------------------|----------|
|       | τ <sub>c</sub> (10 <sup>-11</sup> s) | η (Pa·s) | τ <sub>c</sub> (10 <sup>-11</sup> s) | η (Pa·s) | τ <sub>c</sub> (10 <sup>-11</sup> s) | η (Pa·s) |
| 276 K | 3.47                                 | 0.0094   | 5.54                                 | 0.015    | N/A                                  | N/A      |
| 268 K | 5.04                                 | 0.013    | 9.09                                 | 0.024    | 13.1                                 | 0.034    |
| 263 K | 5.82                                 | 0.015    | 9.49                                 | 0.024    | 27.3                                 | 0.070    |
| 258 K | 8.73                                 | 0.022    | 30.8                                 | 0.077    | 254                                  | 0.64     |
| 253 K | 16.2                                 | 0.040    | 40.3                                 | 0.10     | N/A                                  | N/A      |

## Movie 1

Incorporating 1 wt% DBE-224 PDMS-PEG copolymer into a 20 μm thick PDMS elastomer film delays the heterogeneous nucleation of ice in a water drop of 300 μL placed on the top surface by 2-3 min. The PDMS elastomer film coated on a silicon wafer is maintained at -15 °C by a Peltier cooling plate placed underneath. A PDMS elastomer film containing no PDMS-PEG copolymer was used as a control. The movie is sped up by a factor of 20.
